# Supplementary material for: Abnormal Voxel-Wise Degree Centrality in Patients With Late-Life Depression: A Resting-State Functional Magnetic Resonance Imaging Study
Source: PubMed Central journal article supplement (PMC7005207; doi:10.3389/fpsyt.2019.01024), 2020-01-31

**Table S1. Brain areas showing different DC between LLD patients and HCs (AlphaSim correction of  $p < 0.05$  with a combination of voxel  $p < 0.01$  and cluster size  $> 29$ ).**

| Region (AAL name)          | Peak MNI coordinate |     |     | Voxel size | Peak $T$ value |
|----------------------------|---------------------|-----|-----|------------|----------------|
|                            | $x$                 | $y$ | $z$ |            |                |
| <b>LLD &gt; HC</b>         |                     |     |     |            |                |
| Angular_R / Parietal_Inf_R | 42                  | -57 | 39  | 29         | 4.24           |
| Temporal_Inf_R             | 63                  | -30 | -21 | 38         | 3.87           |
| Temporal_Pole_Sup_R        | 39                  | 15  | -27 | 36         | 4.12           |
| Temporal_Pole_Sup_L        | -42                 | 9   | -18 | 29         | 4.06           |
| Parahippocampal Gyrus_R    | 15                  | -15 | -27 | 88         | 5.21           |
| Brainstem_R / L            | 3                   | -39 | -33 | 52         | 4.42           |
| Cerebelum_Crus2_L          | -3                  | -90 | -36 | 94         | 5.23           |
| <b>LLD &lt; HC</b>         |                     |     |     |            |                |
| Postcentral_R              | 18                  | -33 | 57  | 110        | -4.60          |
| Postcentral / Precentral_L | -24                 | -30 | 54  | 146        | -5.44          |
| Precentral_R               | 39                  | -9  | 42  | 78         | -4.15          |
| Temporal_Mid_R             | 51                  | -69 | 6   | 31         | -4.13          |
| Occipital_Mid_L            | -48                 | -72 | 3   | 34         | -3.92          |
| Fusiform_L                 | -24                 | -81 | -15 | 72         | -4.33          |
| Lingual_R                  | 24                  | -45 | -6  | 34         | -4.93          |
| Calcarine_L                | -21                 | -93 | 18  | 165        | -4.43          |
| Putamen_R                  | 18                  | 21  | -15 | 29         | -4.29          |
| Cerebelum_8_R              | 18                  | -69 | -54 | 45         | -4.28          |
| Cerebelum_8_L              | -24                 | -69 | -57 | 68         | -4.22          |

**Table S2. Brain areas showing different DC between LOD patients and EOD patients (AlphaSim correction of  $p < 0.05$  with a combination of voxel  $p < 0.01$  and cluster size  $> 28$ ).**

| Region (AAL name)   | Peak MNI coordinate |          |          | Voxel size | Peak <i>T</i> value |
|---------------------|---------------------|----------|----------|------------|---------------------|
|                     | <i>x</i>            | <i>y</i> | <i>z</i> |            |                     |
| <b>LOD &gt; EOD</b> |                     |          |          |            |                     |
| Precuneus_R / L     | 3                   | -72      | 45       | 50         | 3.74                |
| Temporal_Mid_R      | 54                  | -63      | 12       | 85         | 5.70                |
| ParaHippocampal_R   | 21                  | -9       | -33      | 28         | 3.88                |
| <b>LOD &lt; EOD</b> |                     |          |          |            |                     |
| Lingual_R           | 15                  | -78      | -12      | 58         | -4.15               |
| Calcarine_L         | -9                  | -96      | -3       | 31         | -3.75               |
| Cuneus_R            | 12                  | -93      | 12       | 100        | -5.41               |

**Figure S1. Brain areas showing difference in DC between LLD patients and HCs (AlphaSim correction of  $p < 0.05$  with a combination of voxel  $p < 0.01$  and cluster size  $> 29$ ), with gender, age, education, score on MMSE and framewise displacement regressed out.** Upper: rendering views. Lower: axial slice views. Color bars indicate  $T$ -score; a warm color indicates areas where DC value in LLD patients  $>$  DC value in HCs, a cold color indicates areas where DC value in LLD patients  $<$  DC value in HCs. DC, degree centrality; HC, healthy control; IPL, inferior parietal lobule; ITG, inferior temporal gyrus; L, left; LLD, late-life depression; R, right.

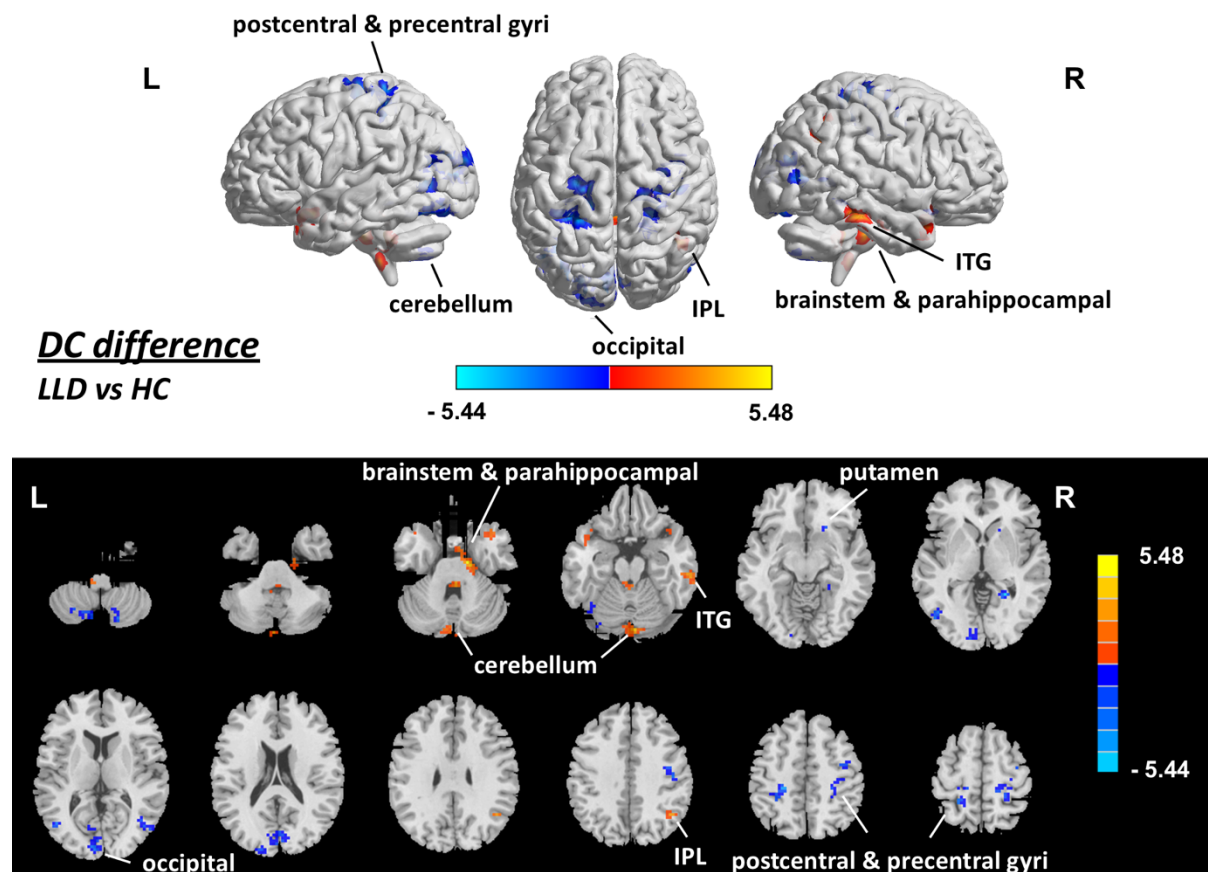

**Figure S2. Brain areas showing difference in DC between LOD and EOD patients (AlphaSim correction of  $p < 0.05$  with a combination of voxel  $p < 0.01$  and cluster size  $> 28$ ), with gender, age, education, score on MMSE and framewise displacement regressed out.** Upper: rendering views. Lower: axial slice views. Color bars indicate  $T$ -score; warm color indicates areas whose DC value in LOD patients  $>$  DC value in EOD patients, cold color indicates areas whose DC value in LOD patients  $<$  DC value in EOD patients. EOD, early-onset depression; HC, healthy control; L, left; LOD, late-onset depression; MTG, middle temporal gyrus; R, right; STG, superior temporal gyrus.

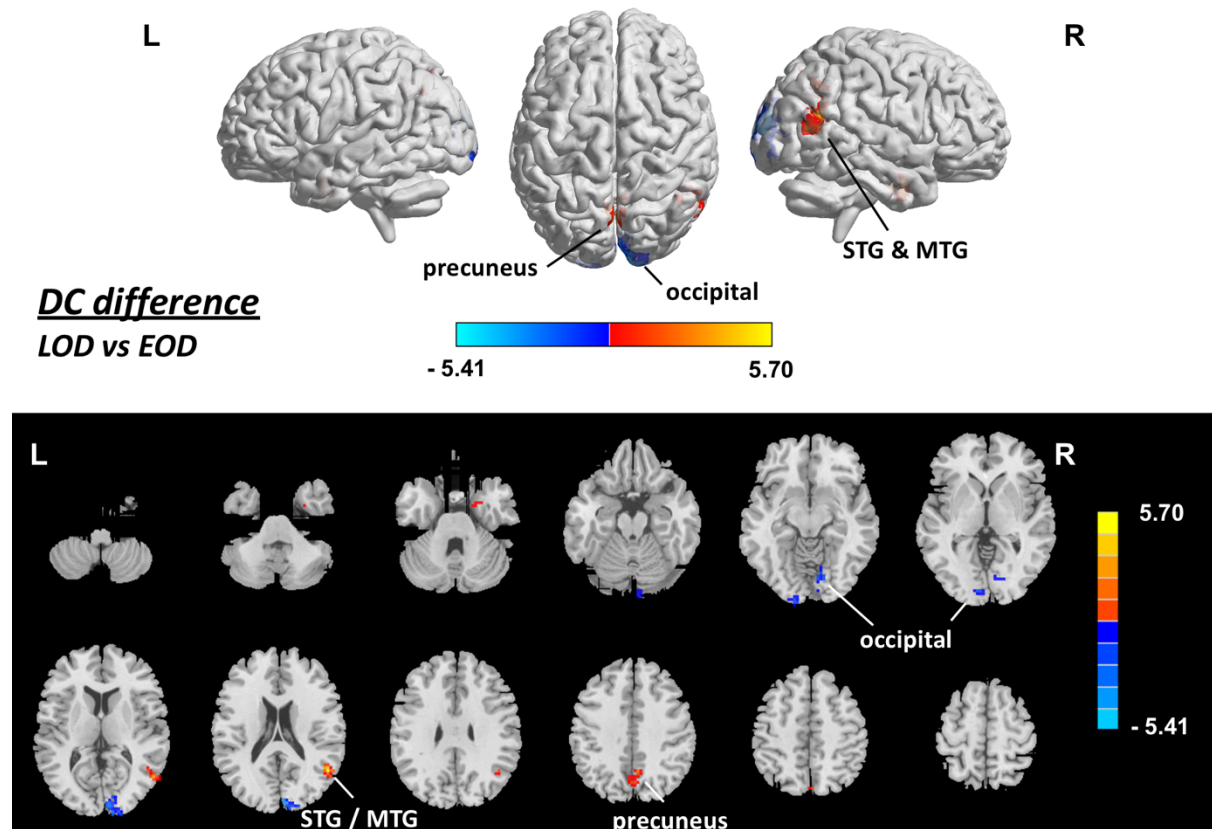

Supplement: DataSheet_1.pdf [file DataSheet_1.pdf]
